# Supplementary material for: Controlled growth of ZnS/ZnO heterojunctions on porous biomass carbons via one-step carbothermal reduction enables visible-light-driven photocatalytic H2 production
Source: Royal Society of Chemistry journal article supplement (doi:10.1039/c9qi00454h), 2019-01-01

## Supporting Information

for

### **Controlled growth of ZnS/ZnO heterojunctions on porous biomass carbons via one-step carbothermal reduction enables visible-light-driven photocatalytic H<sub>2</sub> production**

Hai-Bo Huang,<sup>a,b</sup> Kai Yu,<sup>b</sup> Jun-Tao Wang,<sup>b</sup> Jun-Ru Zhou,<sup>b</sup> Hong-Fang Li,<sup>a</sup> Jian Lü,<sup>a,b,\*</sup> and Rong Cao<sup>a,\*</sup>

<sup>a</sup> *State Key Laboratory of Structural Chemistry, Fujian Institute of Research on the Structure of Matter, Chinese Academy of Sciences, Fuzhou 350002, P.R. China.*

<sup>b</sup> *Fujian Provincial Key Laboratory of Soil Environmental Health and Regulation, College of Resources and Environment, Fujian Agriculture and Forestry University, Fuzhou 350002, P.R. China.*

\*Corresponding authors. E-mail: jian\_lu\_fafu@163.com (J.L.); rcao@fjirsm.ac.cn (R.C.).

*Number of pages: 8*

*Number of tables: 3*

*Number of figures: 6*

## Table Caption

**Table S1** Elemental analysis and ICP results of the PBCs and ZnS/ZnO@C800-n (n = 0.5/1/2/3).

**Table S2** Band gap energy ( $E_g$ ), specific surface area ( $S_{BET}$ ) and H<sub>2</sub> production rate activity of ZnS/ZnO@C800-n (n = 0.5/1/2/3).

**Table S3** Time-resolved fluorescence decay parameters of ZnS/ZnO@C800-n (n = 0.5/1/2/3).

## Figure Caption

**Fig. S1.** (a) Thermogravimetric analysis (TGA) of ZnSO<sub>4</sub>·7H<sub>2</sub>O precursor; and (b) powder X-ray diffraction (PXRD) patterns of ZnS/ZnO@CT-1 (T = 600/700/900) composite materials.

**Fig. S2.** (a) N<sub>2</sub> adsorption/desorption isotherms; and (b) pore-size distribution of the PBCs support and ZnS/ZnO@C800-n (n = 0.5/2/3).

**Fig. S3.** High-resolution XPS spectra of ZnS/ZnO@C800-n (n = 0.5/2/3) for (a) C 1s; (b) Zn 2p; (c) O 1s; and (d) S 2p.

**Fig. S4.** Photoluminescence (PL) spectra (Excitation spectrum) of ZnS/ZnO@C800-n (n = 0.5/1/2/3).

**Fig. S5.** (a) PXRD patterns; (b) UV-vis DRS spectra (Inset: the K-M plots); (c) Mott-Schottky plots; and (d) room-temperature ESR spectra of ZnO and ZnO-Ov.

**Fig. S6.** (a) UV-vis DRS spectra (Inset: the K-M plots); (b) Mott-Schottky plots of ZnS.

## Characterizations

Powder X-ray diffraction (PXRD) patterns were collected by using a Rigaku Miniflex 600 X-ray diffractometer with Cu K $\alpha$  radiation ( $\lambda = 0.154$  nm). Scanning electron microscopy (SEM) images were photographed by using a JSM6700-F with a working voltage of 10 kV. Transmission electron microscopy (TEM) and high resolution TEM (HR-TEM) images were recorded by using an FEIT 20 working at 200 kV. The inter-planer distances and the inverse Fast Fourier Transform (FFT) were calculated using the Digital Micrograph software. X-ray photoelectron spectroscopy (XPS) measurements were performed on a Thermo Fisher ESCALAB 250Xi spectrometer with Al K $\alpha$  X-ray source (15 kV, 10 mA). In order to compensate effects related to charge shifts C 1s peak at 284.6 eV was used as internal standard. Diffuse reflectance spectra (DRS) were recorded on a Shimadzu UV-vis spectrophotometer (UV-2550) with BaSO<sub>4</sub> as the background. The photoluminescence (PL) spectra and time-resolved fluorescence emission spectrum were collected on a FLS 980 fluorescence spectrometer at room temperature. Elemental analyses (C, H, O and S) were performed on a CE-440 elemental analyzer. Zn was determined using a Jobin Yvon Ultima2 inductively coupled plasma (ICP) atomic emission spectrometer. Thermogravimetric analyses (TGA) were performed under N<sub>2</sub> atmosphere with a heating rate of 10 °C min<sup>-1</sup> by using a SDT Q600 thermogravimetric analyzer. N<sub>2</sub> adsorption-desorption isotherms were obtained on a Micromeritics ASAP 2460 instrument and used for Brunauer-Emmett-Teller (BET) surface area and pore size distribution (PSD) calculations. Electron spin resonance (ESR) spectra were recorded on a Bruker E500 spectrometer.

**Table S1**

| <b>Composite photocatalyst</b> | <b>C (%)</b> | <b>O (%)</b> | <b>S (%)</b> | <b>Zn (%)</b> | <b>ZnS:ZnO</b> |
|--------------------------------|--------------|--------------|--------------|---------------|----------------|
|--------------------------------|--------------|--------------|--------------|---------------|----------------|

| PBCs             | 67.7 | N.A. | N.A. | N.A. | N.A.  |
|------------------|------|------|------|------|-------|
| ZnS/ZnO@C800-0.5 | 53.4 | 8.33 | 1.85 | 7.55 | 1:1   |
| ZnS/ZnO@C800-1   | 39.2 | 10.2 | 2.75 | 16.9 | 1:2   |
| ZnS/ZnO@C800-2   | 26.3 | 12.6 | 3.85 | 31.3 | 1:3   |
| ZnS/ZnO@C800-3   | 18.2 | 14.1 | 4.40 | 44.3 | 1:4.7 |

**Table S2**

| Composite photocatalyst | $E_g$ (eV) | $S_{BET}$ (m <sup>2</sup> g <sup>-1</sup> ) | H <sub>2</sub> production activity (μmol h <sup>-1</sup> g <sup>-1</sup> ) |
|-------------------------|------------|---------------------------------------------|----------------------------------------------------------------------------|
| ZnS/ZnO@C800-0.5        | 3.01       | 1779                                        | 3.12                                                                       |
| ZnS/ZnO@C800-1          | 2.94       | 1331                                        | 37.1                                                                       |
| ZnS/ZnO@C800-2          | 2.98       | 874.6                                       | 18.6                                                                       |
| ZnS/ZnO@C800-3          | 3.01       | 533.1                                       | 4.68                                                                       |

**Table S3**

| Composite photocatalyst | Lifetime $\langle\tau\rangle$ (ns) | Pre-exponential factor $A\%$ | $\langle\tau_{ave}\rangle$ (ns)* |
|-------------------------|------------------------------------|------------------------------|----------------------------------|
| ZnS/ZnO@C800-0.5        | $\tau_1=3.3$                       | $A_1 = 25.63$                | 198.7                            |
|                         | $\tau_2=29.0$                      | $A_2 = 35.14$                |                                  |
|                         | $\tau_3=220.6$                     | $A_3 = 39.23$                |                                  |
| ZnS/ZnO@C800-1          | $\tau_1=1.6$                       | $A_1 = 38.37$                | 125.8                            |
|                         | $\tau_2=15.8$                      | $A_2 = 28.20$                |                                  |
|                         | $\tau_3=138.1$                     | $A_3 = 33.43$                |                                  |
| ZnS/ZnO@C800-2          | $\tau_1=1.5$                       | $A_1 = 12.33$                | 140.8                            |
|                         | $\tau_2=17.6$                      | $A_2 = 25.19$                |                                  |
|                         | $\tau_3=156.2$                     | $A_3 = 62.48$                |                                  |
| ZnS/ZnO@C800-3          | $\tau_1=2.4$                       | $A_1 = 31.97$                | 149.9                            |
|                         | $\tau_2=19.4$                      | $A_2 = 32.06$                |                                  |
|                         | $\tau_3=168.2$                     | $A_3 = 35.97$                |                                  |

\* Time-resolved fluorescence decay curves were fitted by using the three-exponential fitting method. Average lifetime  $\langle\tau_{ave}\rangle$  was determined by using the following equation:

$$\langle\tau_{ave}\rangle = \frac{\sum_{i=1}^{i=n} A_i \tau_i^2}{\sum_{i=1}^{i=n} A_i \tau_i} \text{ according to the literature [S1].}$$

## References

(S1) M. Zhou, S. B. Wang, P. J. Yang, C. J. Huang and X. C. Wang, *ACS Catal.*, 2018, **8** (6), 4928-4936.

**Fig. S1.**

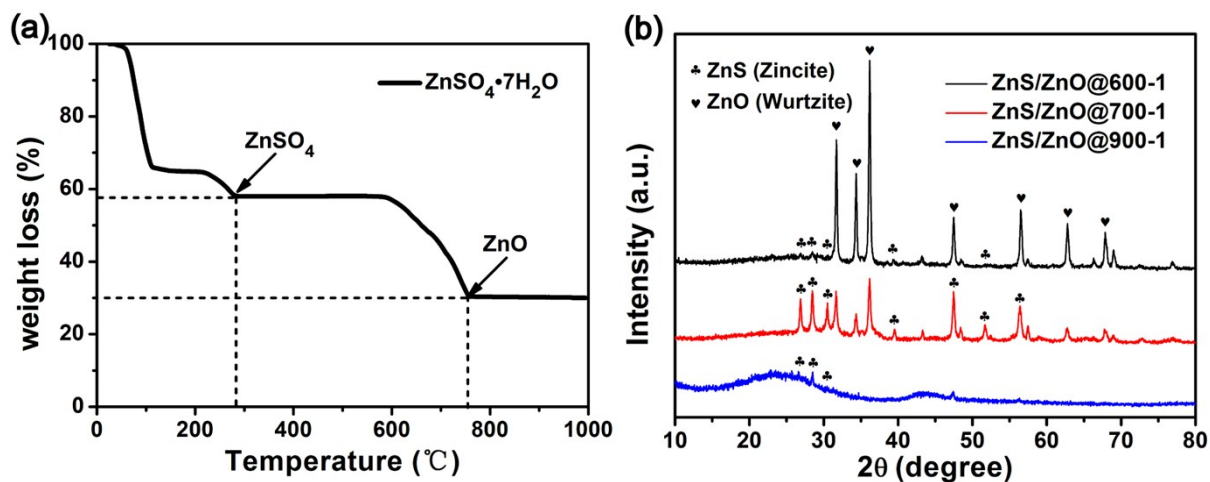

Fig. S2.

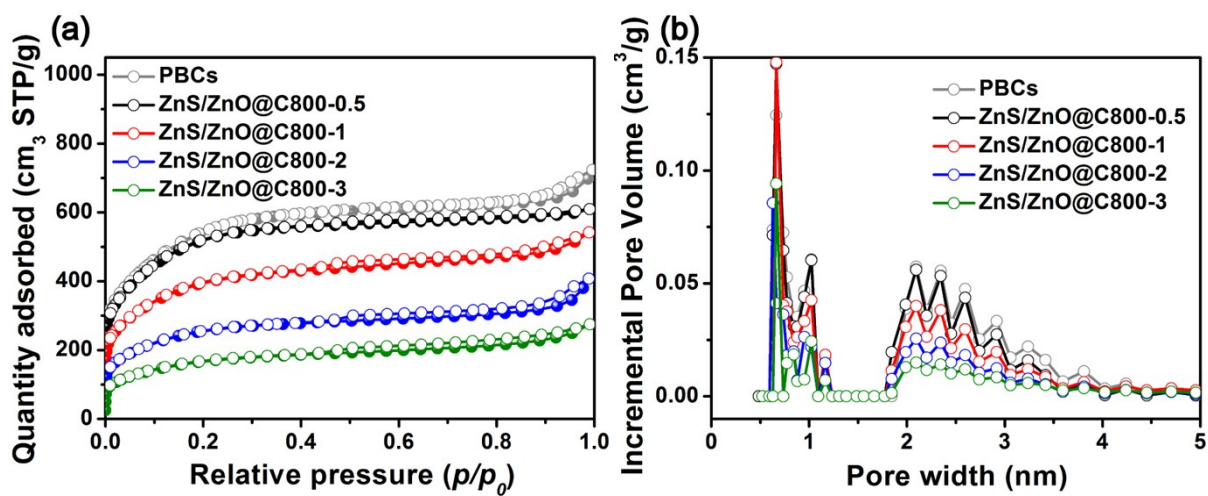

Fig. S3.

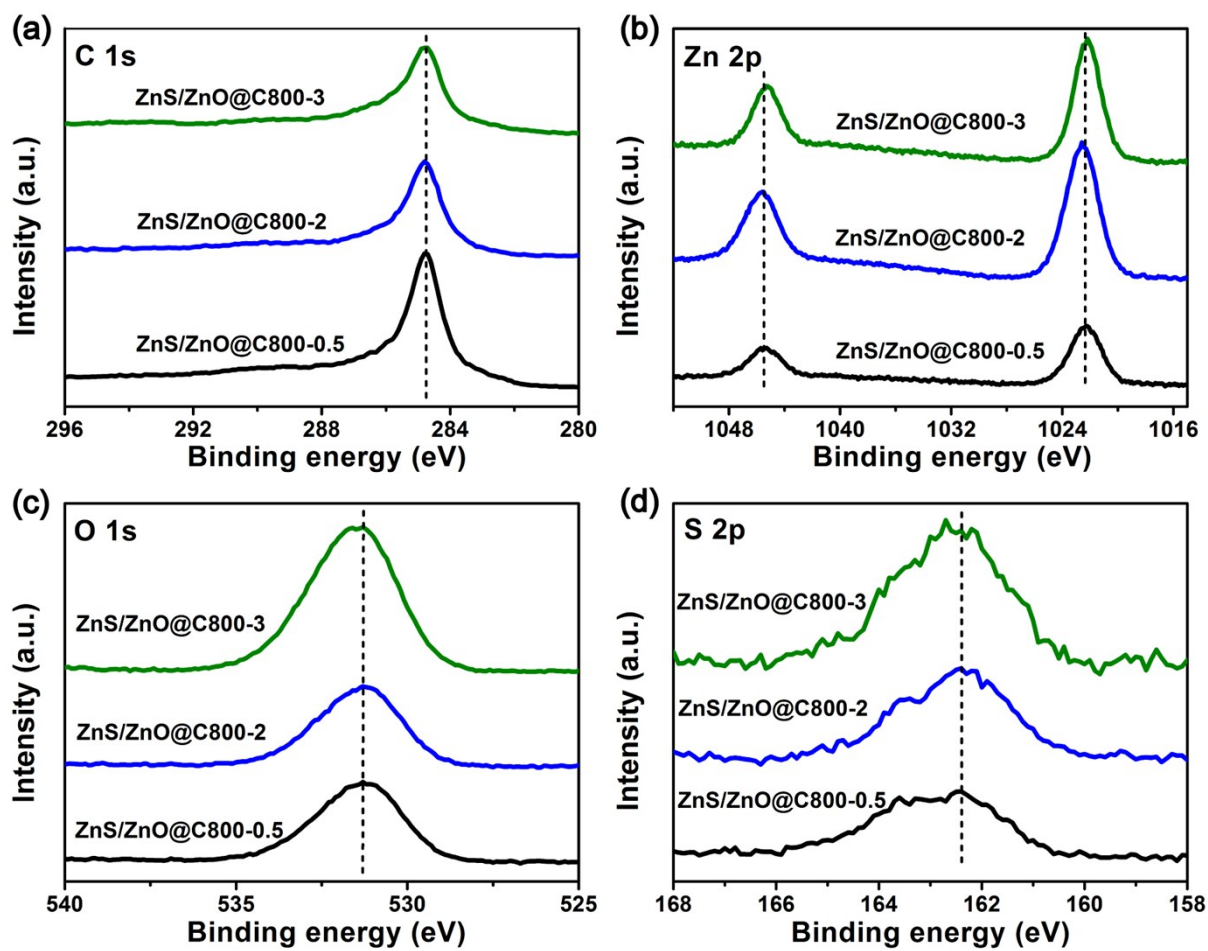

Fig. S4.

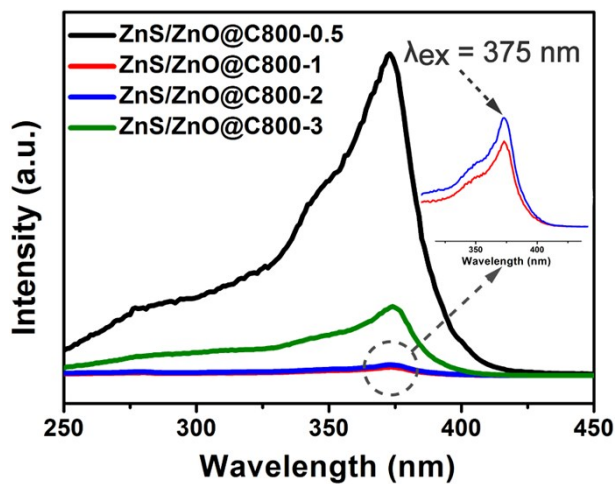

Fig. S5.

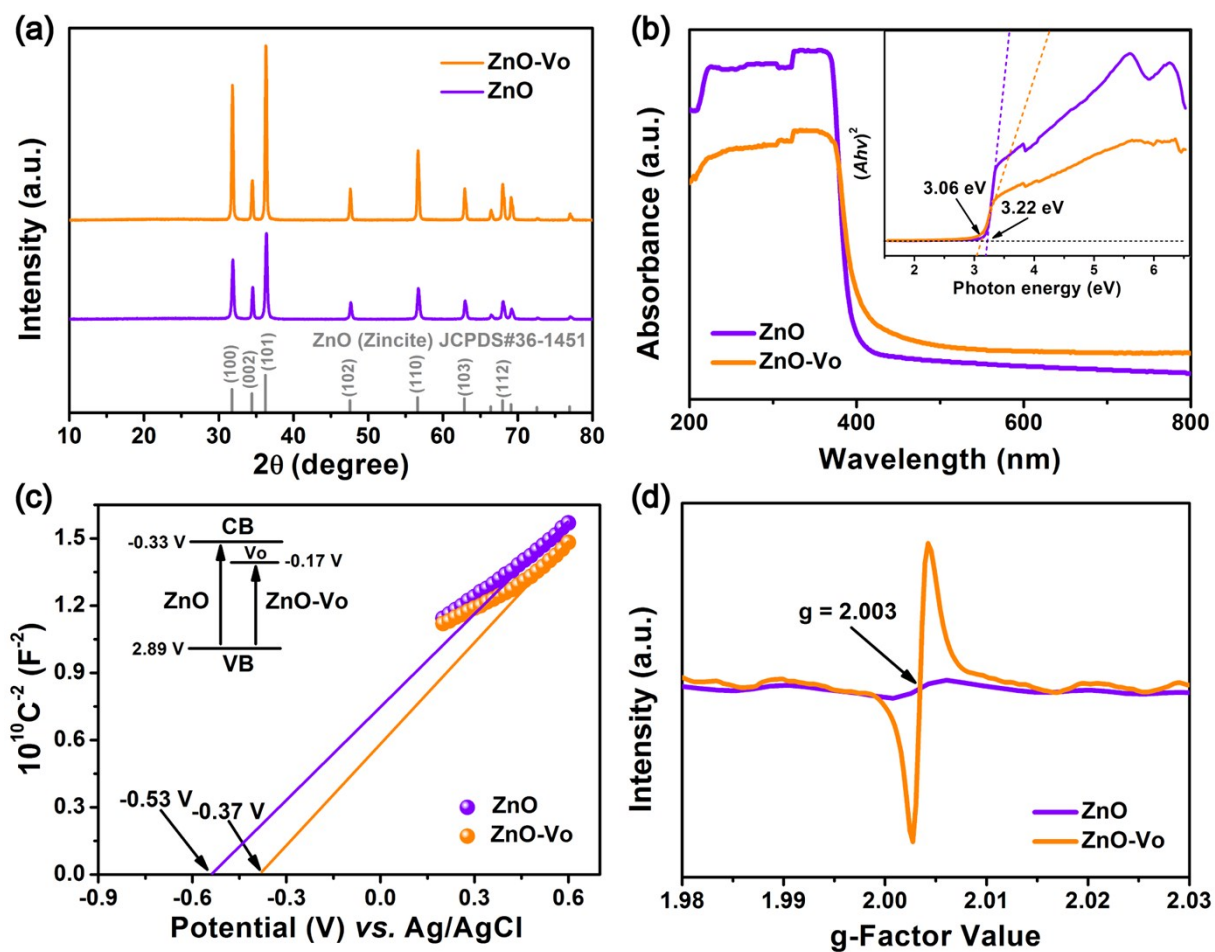

Fig. S6.

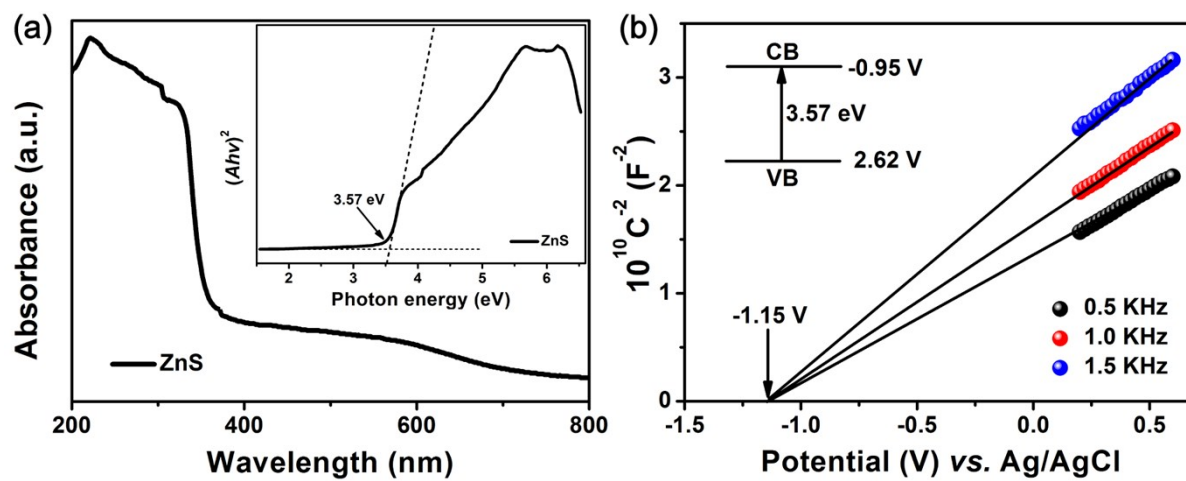

Supplement: c9qi00454h1.pdf [file c9qi00454h1.pdf]
